# Supplementary material
Source: PubMed Central journal article supplement (PMC5275771)
Supplement: BPH-173-2859-s004.pdf [file BPH-173-2859-s004.pdf]

## SUPPORTING INFORMATION - FIGURE LEGENDS

**Figure S1.** ASCs or CM improves the pulmonary blood flow in PH. (A) Image of pulsed Doppler recordings of all the experimental groups. After two weeks of MCT-insult, ASCs or CM was administered through the jugular vein. Pulsed Doppler recordings were measured after 28 days of MCT-insult. ASCs or CM treatment improved the pulmonary blood flow. Mid-systolic notch observed in the PH animals (white arrows) were absent in presence of ASCs or CM.

**Figure S2.** Dermal Fibroblasts (DF) or DF derived CM (DF-CM) did not improve MCT-induced PH. DF ( $1 \times 10^6$ ) or DF-CM (harvested from  $1 \times 10^6$  DF) were injected through a jugular cannula, 2 weeks following the MCT insult. Following 4 weeks of MCT injection, ventricular hemodynamics were measured. (A) and (B) represent the RVSP and RVH in MCT animals in the presence of DF or DF-CM. Data represented in (A) and (B) are mean  $\pm$  SEM, Con (n=7), MCT (n=7), MCT+M (n=7), MCT+DF (n=7), MCT+DF-CM (n=6). \* Indicates a  $p$  value of  $\leq 0.05$ , comparing MCT and MCT+M vs control.

**Figure S3.** Presence of eGFP-ASCs in PH lung. In the MCT+A group, eGFP-ASCs were administered through the jugular vein after 14 days of MCT-insult. After 28 days of MCT-insult, lungs were collected, sectioned and analyzed for the presence of eGFP-ASCs by staining with GFP antibody. Images were photographed at 400X. Images represented (A) eGFP, (B) DAPI, and (C) Composite (Merge). Scale bar is 50  $\mu$ m. White arrows indicate the DAPI stained eGFP-ASCs. (D) Average number of eGFP-ASCs present in 10 randomly chosen field for three different animals. Further to confirm the presence of eGFP, the same three lung samples were

analyzed by real time RT-PCR. (E) Represents the  $C_T$  values of GFP and GAPDH product in RT-PCR.

## **SUPPORTING INFORMATION - MOVIE LEGENDS**

**Movie S1.** Para-sternal short-axis ventricles view (papillary muscle level) of the control animals on Day-0.

**Movie S2.** Para-sternal short-axis ventricles view (papillary muscle level) of the control animals on Day-14.

**Movie S3.** Para-sternal short-axis ventricles view (papillary muscle level) of the MCT animals on Day-14.

**Movie S4.** Para-sternal short-axis ventricles view (papillary muscle level) of the control animals on Day-28.

**Movie S5.** Para-sternal short-axis ventricles view (papillary muscle level) of the MCT animals on Day-28.

**Movie S6.** Para-sternal short-axis ventricles view (papillary muscle level) of the MCT+ASCs animals on Day-28.

**Movie S7.** Para-sternal short-axis ventricles view (papillary muscle level) of the MCT+Media animals on Day-28.

**Movie S8.** Para-sternal short-axis ventricles view (papillary muscle level) view of the MCT+CM animals on Day-28.

**Table S1: Rat primers used for RT-PCR experiment**

| No  | Gene           |   | Sequence                |
|-----|----------------|---|-------------------------|
| 1.  | TNF- $\alpha$  | F | GTAGCCACGTCGTAGCAAA     |
|     |                | R | CCCTTCTCCAGCTGGGAGAC    |
| 2.  | IL1- $\beta$   | F | TGATGTTCCCATTAGACAGC    |
|     |                | R | GAGGTGCTGATGTACCAGTT    |
| 3.  | iNOS           | F | CCTTGTTTCAGCTACGCCTTC   |
|     |                | R | GGTATGCCCGAGTTCTTTCA    |
| 4.  | IL-10          | F | TGCTACGACGTGGGCTACG     |
|     |                | R | TGCAGTCCAGTAGATGCCGGG   |
| 5.  | GFP            | F | TGGTCCCAATTCTCGTGGAA    |
|     |                | R | CCTCTCCGCTGACAGAAAATTT  |
| 6.  | SDF-1 $\alpha$ | F | TGAGATTTGCCAGCACAAAG    |
|     |                | R | CTCTCGGCAAGGAATCTGTC    |
| 7.  | G-CSF          | F | TGCTCTGGAGAACGAAAAGAACG |
|     |                | R | ATTGAGTTTGGTGAGGTTGCCCC |
| 8.  | 18S            | F | TGCTGCAGTTAAAAAGCTCGT   |
|     |                | R | GGCCTGCTTTGAACA CTCTAA  |
| 9.  | IL-6           |   | Rn01410330_m1           |
| 10. | COL1           |   | Rn01523309_m1           |
| 11. | COL3           |   | Rn01437681_m1           |
| 12. | CCL2           |   | Rn00580555_m1           |
| 13. | TIMP-1         |   | Rn01430873_g1           |
| 14. | MMP-12         |   | Rn00588640_m1           |
| 15. | IL-13          |   | Rn00587615_m1           |
| 16. | CTGF           |   | Rn01537279_g1           |
| 17. | 18S            |   | Hs99999901_s1           |
| 18. | GAPDH          |   | Rn01775763_g1           |
