# Supplementary material
Source: PubMed Central journal article supplement (PMC5275771)

# Figure S1

**A**

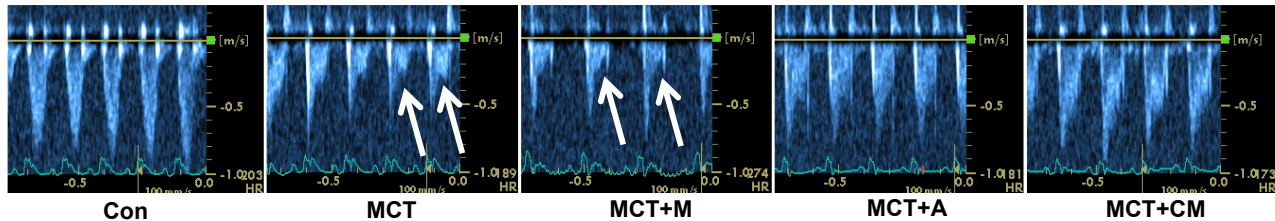

Supplement: BPH-173-2859-s001.pdf [file BPH-173-2859-s001.pdf]

# Figure S2

## A

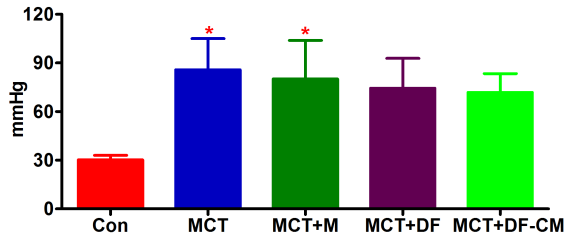

## B

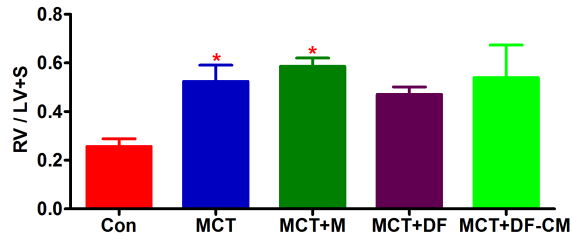

Supplement: BPH-173-2859-s002.pdf [file BPH-173-2859-s002.pdf]

# Figure S3

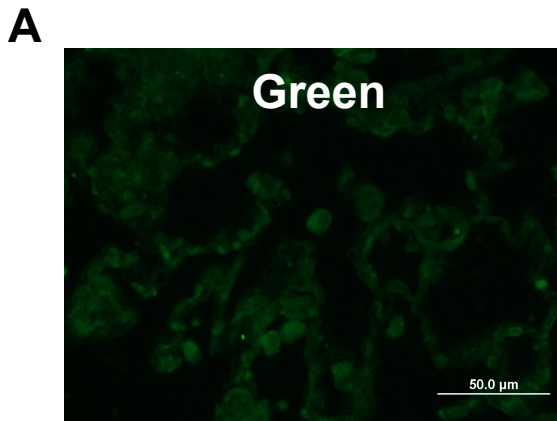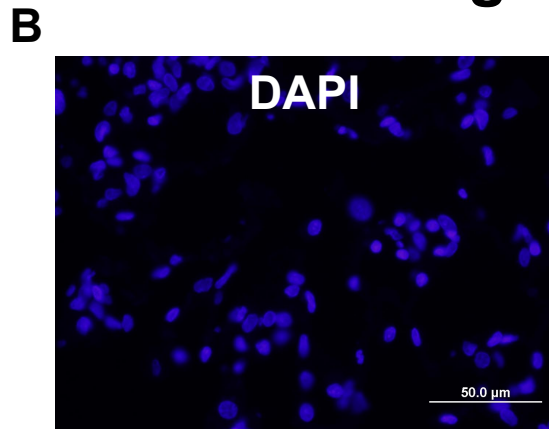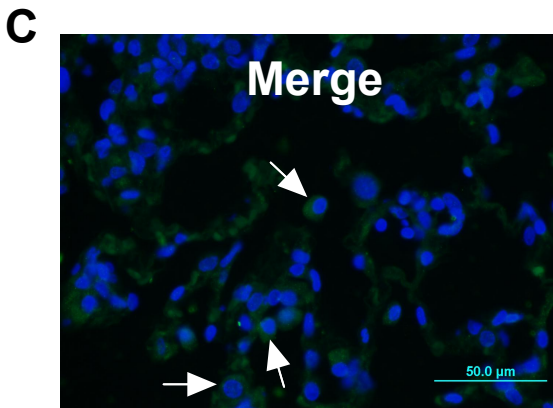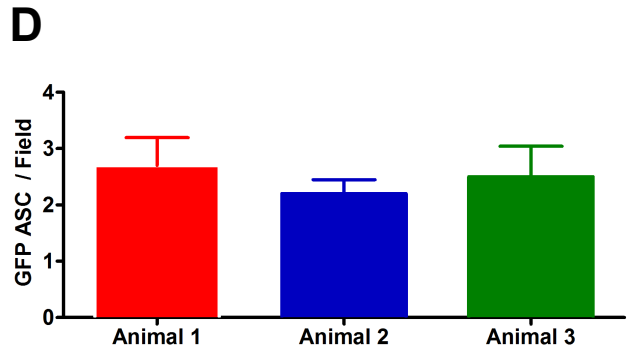

**E**

RT-PCR  $C_T$  values

| Animal | MCT+A           |                   | Con             |                   |
|--------|-----------------|-------------------|-----------------|-------------------|
|        | GFP $C_T$ Value | GAPDH $C_T$ Value | GFP $C_T$ Value | GAPDH $C_T$ Value |
| 1      | 10.85           | 23.48             | -               | 24.56             |
| 2      | 7.13            | 22.92             | -               | 23.58             |
| 3      | 11.99           | 22.89             | -               | 25.52             |

Supplement: BPH-173-2859-s003.pdf [file BPH-173-2859-s003.pdf]
